# Supplementary material for: Chemometrics-Driven Variability Evaluation of Phenolic Composition, Antioxidant Capacity, and α-Glucosidase Inhibition of Sorbus aucuparia L. Fruits from Poland: Identification of Variability Markers for Plant Material Valorization
Source: MDPI journal article supplement (doi:10.3390/antiox12111967), 2023-11-05
Supplement: s1 [file s1]

**Table S1.** Quantitative profile of individual compounds in the *S. aucuparia* fruits (mg/g fruits dw).

| Sample | NCHA                             | CHA                             | CCHA                             | 1-CHA                             | diCAQ                             | 5-FQA                            | PC1                               | RT                               | SQ                               | diHQ                            | HY                              | IQ                               |
|--------|----------------------------------|---------------------------------|----------------------------------|-----------------------------------|-----------------------------------|----------------------------------|-----------------------------------|----------------------------------|----------------------------------|---------------------------------|---------------------------------|----------------------------------|
| 1      | 2.2413 ±<br>0.0117 <sup>EF</sup> | 1.8572 ±<br>0.0107 <sup>A</sup> | 0.0516 ±<br>0.0020 <sup>CD</sup> | 0.1071 ±<br>0.0010 <sup>BCD</sup> | 0.1798 ±<br>0.0013 <sup>DEF</sup> | 0.0250 ±<br>0.0001 <sup>G</sup>  | 0.0427 ±<br>0.0018 <sup>BC</sup>  | 0.0145 ±<br>0.0004 <sup>B</sup>  | 0.2625 ±<br>0.0016 <sup>D</sup>  | 0.1099 ±<br>0.0005 <sup>G</sup> | 0.0492 ±<br>0.0005 <sup>B</sup> | 0.0735 ±<br>0.0024 <sup>FG</sup> |
| 2      | 3.7256 ±<br>0.0448 <sup>J</sup>  | 2.8055 ±<br>0.0330 <sup>C</sup> | 0.0945 ±<br>0.0029 <sup>I</sup>  | 0.1184 ±<br>0.0017 <sup>D</sup>   | 0.1106 ±<br>0.0013 <sup>B</sup>   | 0.0342 ±<br>0.0007 <sup>J</sup>  | 0.0546 ±<br>0.0003 <sup>CDE</sup> | 0.0095 ±<br>0.0001 <sup>A</sup>  | 0.4904 ±<br>0.0069 <sup>H</sup>  | 0.1066 ±<br>0.0005 <sup>G</sup> | 0.0637 ±<br>0.0026 <sup>D</sup> | 0.0505 ±<br>0.0023 <sup>CD</sup> |
| 3      | 1.8836 ±<br>0.0245 <sup>C</sup>  | 3.2194 ±<br>0.0487 <sup>E</sup> | 0.0456 ±<br>0.0014 <sup>BC</sup> | 0.1873 ±<br>0.0017 <sup>H</sup>   | 0.1813 ±<br>0.0013 <sup>EF</sup>  | 0.0229 ±<br>0.0009 <sup>EF</sup> | 0.0477 ±<br>0.0005 <sup>CD</sup>  | 0.0894 ±<br>0.0023 <sup>K</sup>  | 0.1528 ±<br>0.0036 <sup>B</sup>  | 0.1631 ±<br>0.0033 <sup>I</sup> | 0.1231 ±<br>0.0042 <sup>G</sup> | 0.1228 ±<br>0.0018 <sup>J</sup>  |
| 4      | 1.8660 ±<br>0.0033 <sup>C</sup>  | 3.8219 ±<br>0.0097 <sup>F</sup> | 0.0403 ±<br>0.0004 <sup>AB</sup> | 0.1675 ±<br>0.0063 <sup>FG</sup>  | 0.1765 ±<br>0.0008 <sup>DE</sup>  | 0.0249 ±<br>0.0007 <sup>G</sup>  | 0.0689 ±<br>0.0020 <sup>EF</sup>  | 0.1624 ±<br>0.0021 <sup>O</sup>  | 0.7775 ±<br>0.0009 <sup>N</sup>  | 0.2265 ±<br>0.0019 <sup>L</sup> | 0.2327 ±<br>0.0014 <sup>K</sup> | 0.1099 ±<br>0.0013 <sup>I</sup>  |
| 5      | 2.1224 ±<br>0.0232 <sup>D</sup>  | 4.0293 ±<br>0.0383 <sup>G</sup> | 0.0690 ±<br>0.0006 <sup>FG</sup> | 0.1680 ±<br>0.0040 <sup>FG</sup>  | 0.1882 ±<br>0.0008 <sup>F</sup>   | 0.0229 ±<br>0.0004 <sup>EF</sup> | 0.0461 ±<br>0.0011 <sup>CD</sup>  | 0.0704 ±<br>0.0006 <sup>I</sup>  | 0.2235 ±<br>0.0031 <sup>C</sup>  | 0.0617 ±<br>0.0013 <sup>B</sup> | 0.1758 ±<br>0.0016 <sup>J</sup> | 0.0840 ±<br>0.0007 <sup>H</sup>  |
| 6      | 1.3977 ±<br>0.0240 <sup>A</sup>  | 2.7384 ±<br>0.0436 <sup>C</sup> | 0.0373 ±<br>0.0009 <sup>A</sup>  | 0.1109 ±<br>0.0021 <sup>CD</sup>  | 0.2558 ±<br>0.0039 <sup>I</sup>   | < LOQ <sup>A</sup>               | 0.0423 ±<br>0.0007 <sup>BC</sup>  | 0.0542 ±<br>0.0006 <sup>H</sup>  | 0.3526 ±<br>0.0047 <sup>E</sup>  | 0.2081 ±<br>0.0038 <sup>K</sup> | 0.0702 ±<br>0.0003 <sup>E</sup> | 0.0794 ±<br>0.0006 <sup>H</sup>  |
| 7      | 3.5135 ±<br>0.0641 <sup>I</sup>  | 2.7591 ±<br>0.0508 <sup>C</sup> | 0.1425 ±<br>0.0025 <sup>K</sup>  | 0.0998 ±<br>0.0043 <sup>BC</sup>  | 0.0233 ±<br>0.0004 <sup>A</sup>   | 0.0233 ±<br>0.0004 <sup>F</sup>  | 0.0610 ±<br>0.0010 <sup>DEF</sup> | 0.1414 ±<br>0.0020 <sup>N</sup>  | 0.5057 ±<br>0.0079 <sup>HI</sup> | 0.1904 ±<br>0.0023 <sup>J</sup> | 0.1516 ±<br>0.0026 <sup>H</sup> | 0.1350 ±<br>0.0039 <sup>K</sup>  |
| 8      | 2.1450 ±<br>0.0172 <sup>DE</sup> | 4.7633 ±<br>0.0348 <sup>I</sup> | 0.0776 ±<br>0.0020 <sup>H</sup>  | 0.2000 ±<br>0.0047 <sup>I</sup>   | 0.1718 ±<br>0.0012 <sup>D</sup>   | 0.0200 ±<br>0.0003 <sup>C</sup>  | 0.0460 ±<br>0.0021 <sup>CD</sup>  | 0.0127 ±<br>0.0005 <sup>AB</sup> | 0.0630 ±<br>0.0008 <sup>A</sup>  | < LOQ <sup>A</sup>              | 0.2445 ±<br>0.0022 <sup>L</sup> | 0.0786 ±<br>0.0010 <sup>GH</sup> |
| 9      | 2.2507 ±<br>0.0125 <sup>EF</sup> | 5.4233 ±<br>0.0284 <sup>L</sup> | 0.0656 ±<br>0.0001 <sup>FG</sup> | 0.2291 ±<br>0.0005 <sup>K</sup>   | 0.2373 ±<br>0.0011 <sup>H</sup>   | 0.0337 ±<br>0.0003 <sup>J</sup>  | 0.0283 ±<br>0.0013 <sup>B</sup>   | 0.1130 ±<br>0.0005 <sup>M</sup>  | 0.7292 ±<br>0.0021 <sup>M</sup>  | 0.1575 ±<br>0.0010 <sup>I</sup> | 0.3187 ±<br>0.0002 <sup>N</sup> | 0.1328 ±<br>0.0009 <sup>K</sup>  |
| 10     | 2.2547 ±<br>0.0358 <sup>F</sup>  | 4.4551 ±<br>0.0613 <sup>H</sup> | 0.0577 ±<br>0.0007 <sup>DE</sup> | 0.2149 ±<br>0.0039 <sup>J</sup>   | 0.2756 ±<br>0.0036 <sup>JK</sup>  | 0.0306 ±<br>0.0003 <sup>I</sup>  | < LOQ <sup>A</sup>                | 0.0237 ±<br>0.0005 <sup>D</sup>  | 0.2660 ±<br>0.0037 <sup>D</sup>  | 0.1064 ±<br>0.0022 <sup>G</sup> | 0.0439 ±<br>0.0012 <sup>A</sup> | 0.0301 ±<br>0.0011 <sup>B</sup>  |

|    |                                  |                                 |                                  |                                   |                                 |                                  |                                  |                                  |                                 |                                  |                                  |                                 |
|----|----------------------------------|---------------------------------|----------------------------------|-----------------------------------|---------------------------------|----------------------------------|----------------------------------|----------------------------------|---------------------------------|----------------------------------|----------------------------------|---------------------------------|
| 11 | 3.5653 ±<br>0.0768 <sup>I</sup>  | 4.8771 ±<br>0.1126 <sup>I</sup> | 0.1275 ±<br>0.0034 <sup>J</sup>  | 0.1418 ±<br>0.0050 <sup>E</sup>   | 0.2836 ±<br>0.0055 <sup>K</sup> | 0.0318 ±<br>0.0004 <sup>I</sup>  | 0.0489 ±<br>0.0012 <sup>CD</sup> | 0.0203 ±<br>0.0006 <sup>C</sup>  | 0.7105 ±<br>0.0184 <sup>L</sup> | 0.0999 ±<br>0.0036 <sup>F</sup>  | 0.0654 ±<br>0.0010 <sup>DE</sup> | 0.0187 ±<br>0.0006 <sup>A</sup> |
| 12 | 2.0963 ±<br>0.0186 <sup>D</sup>  | 5.0332 ±<br>0.0460 <sup>J</sup> | 0.0627 ±<br>0.0008 <sup>EF</sup> | 0.1765 ±<br>0.0073 <sup>GH</sup>  | 0.2573 ±<br>0.0027 <sup>I</sup> | 0.0251 ±<br>0.0002 <sup>G</sup>  | 0.0474 ±<br>0.0014 <sup>CD</sup> | 0.0933 ±<br>0.0007 <sup>L</sup>  | 0.4250 ±<br>0.0024 <sup>G</sup> | 0.0836 ±<br>0.0020 <sup>D</sup>  | 0.2795 ±<br>0.0017 <sup>M</sup>  | 0.1186 ±<br>0.0010 <sup>J</sup> |
| 13 | 3.1189 ±<br>0.0839 <sup>H</sup>  | 4.4065 ±<br>0.1140 <sup>H</sup> | 0.0997 ±<br>0.0048 <sup>I</sup>  | 0.1461 ±<br>0.0048 <sup>E</sup>   | 0.4274 ±<br>0.0076 <sup>O</sup> | 0.0271 ±<br>0.0012 <sup>H</sup>  | 0.0959 ±<br>0.0020 <sup>G</sup>  | 0.0340 ±<br>0.0005 <sup>EF</sup> | 0.3415 ±<br>0.0072 <sup>E</sup> | 0.1452 ±<br>0.0022 <sup>H</sup>  | 0.0560 ±<br>0.0013 <sup>C</sup>  | 0.0447 ±<br>0.0011 <sup>C</sup> |
| 14 | 2.2372 ±<br>0.0156 <sup>EF</sup> | 3.0591 ±<br>0.0209 <sup>D</sup> | 0.0837 ±<br>0.0014 <sup>H</sup>  | 0.1090 ±<br>0.0018 <sup>BCD</sup> | 0.2305 ±<br>0.0009 <sup>H</sup> | < LOQ <sup>A</sup>               | 0.0436 ±<br>0.0008 <sup>BC</sup> | 0.0318 ±<br>0.0003 <sup>E</sup>  | 0.4054 ±<br>0.0029 <sup>F</sup> | 0.0916 ±<br>0.0012 <sup>E</sup>  | 0.1159 ±<br>0.0006 <sup>F</sup>  | 0.0719 ±<br>0.0004 <sup>F</sup> |
| 15 | 1.5717 ±<br>0.0096 <sup>B</sup>  | 4.4021 ±<br>0.0216 <sup>H</sup> | 0.0565 ±<br>0.0007 <sup>DE</sup> | 0.1442 ±<br>0.0027 <sup>E</sup>   | 0.1608 ±<br>0.0009 <sup>C</sup> | < LOQ <sup>A</sup>               | 0.0409 ±<br>0.0009 <sup>BC</sup> | 0.0855 ±<br>0.0004 <sup>J</sup>  | 0.3484 ±<br>0.0017 <sup>E</sup> | 0.2412 ±<br>0.0005 <sup>M</sup>  | 0.0472 ±<br>0.0003 <sup>AB</sup> | 0.0617 ±<br>0.0028 <sup>E</sup> |
| 16 | 1.6726 ±<br>0.0049 <sup>B</sup>  | 2.4859 ±<br>0.0035 <sup>B</sup> | 0.0498 ±<br>0.0021 <sup>C</sup>  | 0.0868 ±<br>0.0024 <sup>A</sup>   | 0.2177 ±<br>0.0005 <sup>G</sup> | < LOQ <sup>A</sup>               | 0.0478 ±<br>0.0012 <sup>CD</sup> | 0.0532 ±<br>0.0005 <sup>H</sup>  | 0.1704 ±<br>0.0004 <sup>B</sup> | 0.0689 ±<br>0.0007 <sup>C</sup>  | 0.0671 ±<br>0.0002 <sup>DE</sup> | 0.0628 ±<br>0.0003 <sup>E</sup> |
| 17 | 2.9579 ±<br>0.0165 <sup>G</sup>  | 5.2530 ±<br>0.0450 <sup>K</sup> | 0.0937 ±<br>0.0003 <sup>I</sup>  | 0.1589 ±<br>0.0025 <sup>F</sup>   | 0.3564 ±<br>0.0015 <sup>N</sup> | 0.0206 ±<br>0.0004 <sup>CD</sup> | 0.0723 ±<br>0.0027 <sup>F</sup>  | 0.0428 ±<br>0.0006 <sup>G</sup>  | 0.6544 ±<br>0.0050 <sup>J</sup> | 0.1494 ±<br>0.0007 <sup>H</sup>  | 0.1603 ±<br>0.0010 <sup>I</sup>  | 0.0659 ±<br>0.0004 <sup>E</sup> |
| 18 | 3.0171 ±<br>0.0177 <sup>GH</sup> | 5.4079 ±<br>0.0366 <sup>L</sup> | 0.0989 ±<br>0.0003 <sup>I</sup>  | 0.1406 ±<br>0.0025 <sup>E</sup>   | 0.3090 ±<br>0.0031 <sup>L</sup> | 0.0184 ±<br>0.0001 <sup>B</sup>  | 0.0461 ±<br>0.0004 <sup>CD</sup> | 0.0228 ±<br>0.0006 <sup>CD</sup> | 0.1606 ±<br>0.0020 <sup>B</sup> | 0.0639 ±<br>0.0003 <sup>BC</sup> | 0.0672 ±<br>0.0011 <sup>DE</sup> | 0.0726 ±<br>0.0047 <sup>F</sup> |
| 19 | 1.8835 ±<br>0.0140 <sup>C</sup>  | 3.3703 ±<br>0.0224 <sup>E</sup> | 0.0695 ±<br>0.0003 <sup>G</sup>  | 0.0986 ±<br>0.0025 <sup>B</sup>   | 0.2739 ±<br>0.0010 <sup>J</sup> | < LOQ <sup>A</sup>               | 0.0449 ±<br>0.0011 <sup>CD</sup> | 0.0371 ±<br>0.0006 <sup>F</sup>  | 0.6917 ±<br>0.0059 <sup>K</sup> | 0.1617 ±<br>0.0036 <sup>I</sup>  | 0.1214 ±<br>0.0020 <sup>G</sup>  | 0.0507 ±<br>0.0018 <sup>D</sup> |
| 20 | 3.8660 ±<br>0.0133 <sup>K</sup>  | 3.7559 ±<br>0.0102 <sup>F</sup> | 0.1000 ±<br>0.0046 <sup>I</sup>  | 0.1406 ±<br>0.0025 <sup>E</sup>   | 0.3393 ±<br>0.0016 <sup>M</sup> | 0.0216 ±<br>0.0005 <sup>DE</sup> | 0.1136 ±<br>0.0230 <sup>H</sup>  | 0.0418 ±<br>0.0009 <sup>G</sup>  | 0.5120 ±<br>0.0024 <sup>I</sup> | 0.1615 ±<br>0.0011 <sup>I</sup>  | 0.0478 ±<br>0.0012 <sup>AB</sup> | 0.0323 ±<br>0.0008 <sup>B</sup> |

Results are presented as means ± SD ( $n = 3$ ). For each parameter, different superscript letters indicate significant differences ( $p < 0.05$ ). LOQ, limit of quantification (HPLC analysis); NCHA, 3-*O*-caffeoylquinic acid; CHA, 5-*O*-caffeoylquinic acid; CCHA, 4-*O*-caffeoylquinic acid; 1-CHA, 1-*O*-caffeoylquinic acid; diCAQA, 3,5-*O*-dicaffeoylquinic acid; 5-FQA, 5-ferulquinic acid; PC1, procyanidin C1; RT, rutin; SQ, quercetin 3-*O*- $\beta$ -sophoroside; diHQ, quercetin *O*-dihexoside; HY, hyperoside; IQ, isoquercitrin.

**Table S2.** Quantitative profile of groups of compounds in the *S. aucuparia* fruits (mg/g fruits dw).

| Sample | TPC                                | TPH                              | THCA                             | TCHA                             | TCFA                             | TFL                              | TPA                               | TLPA                               |
|--------|------------------------------------|----------------------------------|----------------------------------|----------------------------------|----------------------------------|----------------------------------|-----------------------------------|------------------------------------|
| 1      | 21.7545 ±<br>0.5879 <sup>F</sup>   | 5.2512 ±<br>0.0305 <sup>A</sup>  | 4.5931 ±<br>0.0258 <sup>A</sup>  | 4.4371 ±<br>0.0239 <sup>A</sup>  | 0.1561 ±<br>0.0025 <sup>B</sup>  | 0.6154 ±<br>0.0033 <sup>E</sup>  | 15.2069 ±<br>0.2777 <sup>G</sup>  | 0.0427 ±<br>0.0018 <sup>AB</sup>   |
| 2      | 24.9164 ±<br>0.3177 <sup>G</sup>   | 7.9579 ±<br>0.0961 <sup>G</sup>  | 7.1135 ±<br>0.0821 <sup>F</sup>  | 6.8546 ±<br>0.0807 <sup>F</sup>  | 0.2589 ±<br>0.0017 <sup>G</sup>  | 0.7898 ±<br>0.0144 <sup>H</sup>  | 16.5989 ±<br>0.3417 <sup>H</sup>  | 0.0546 ±<br>0.0003 <sup>BCDE</sup> |
| 3      | 21.6538 ±<br>0.6730 <sup>F</sup>   | 6.4239 ±<br>0.0911 <sup>C</sup>  | 5.6686 ±<br>0.0771 <sup>B</sup>  | 5.5172 ±<br>0.0752 <sup>B</sup>  | 0.1514 ±<br>0.0032 <sup>B</sup>  | 0.7077 ±<br>0.0147 <sup>G</sup>  | 14.6099 ±<br>0.3001 <sup>G</sup>  | 0.0477 ±<br>0.0005 <sup>BC</sup>   |
| 4      | 20.1049 ±<br>0.6163 <sup>DEF</sup> | 7.9872 ±<br>0.0120 <sup>G</sup>  | 6.2566 ±<br>0.0053 <sup>D</sup>  | 6.0721 ±<br>0.0075 <sup>C</sup>  | 0.1845 ±<br>0.0025 <sup>C</sup>  | 1.6616 ±<br>0.0057 <sup>P</sup>  | 11.8068 ±<br>0.3214 <sup>EF</sup> | 0.0689 ±<br>0.0020 <sup>EF</sup>   |
| 5      | 17.7048 ±<br>0.5593 <sup>B</sup>   | 7.5495 ±<br>0.0686 <sup>F</sup>  | 6.7744 ±<br>0.0606 <sup>E</sup>  | 6.5769 ±<br>0.0603 <sup>DE</sup> | 0.1975 ±<br>0.0006 <sup>CD</sup> | 0.7290 ±<br>0.0082 <sup>G</sup>  | 10.6517 ±<br>0.3187 <sup>D</sup>  | 0.0461 ±<br>0.0011 <sup>BC</sup>   |
| 6      | 19.7577 ±<br>0.5849 <sup>CDE</sup> | 5.5771 ±<br>0.0815 <sup>B</sup>  | 4.7319 ±<br>0.0714 <sup>A</sup>  | 4.5399 ±<br>0.0712 <sup>A</sup>  | 0.1919 ±<br>0.0019 <sup>C</sup>  | 0.8029 ±<br>0.0095 <sup>HI</sup> | 12.4759 ±<br>0.5308 <sup>F</sup>  | 0.0423 ±<br>0.0007 <sup>AB</sup>   |
| 7      | 18.2406 ±<br>0.5160 <sup>BCD</sup> | 8.3463 ±<br>0.1463 <sup>H</sup>  | 6.9302 ±<br>0.1247 <sup>EF</sup> | 6.6878 ±<br>0.1193 <sup>EF</sup> | 0.2424 ±<br>0.0066 <sup>F</sup>  | 1.3551 ±<br>0.0216 <sup>O</sup>  | 11.2045 ±<br>0.4356 <sup>DE</sup> | 0.0610 ±<br>0.0010 <sup>CDEF</sup> |
| 8      | 21.0177 ±<br>0.6390 <sup>EF</sup>  | 8.0147 ±<br>0.0662 <sup>G</sup>  | 7.5700 ±<br>0.0628 <sup>G</sup>  | 7.3577 ±<br>0.0598 <sup>GH</sup> | 0.2123 ±<br>0.0050 <sup>DE</sup> | 0.3988 ±<br>0.0016 <sup>A</sup>  | 12.1098 ±<br>0.1754 <sup>EF</sup> | 0.0460 ±<br>0.0021 <sup>BC</sup>   |
| 9      | 25.5503 ±<br>1.0568 <sup>GH</sup>  | 10.4224 ±<br>0.0503 <sup>L</sup> | 8.5211 ±<br>0.0445 <sup>H</sup>  | 8.2061 ±<br>0.0424 <sup>I</sup>  | 0.3150 ±<br>0.0035 <sup>I</sup>  | 1.8730 ±<br>0.0046 <sup>Q</sup>  | 15.4672 ±<br>0.5727 <sup>G</sup>  | 0.0283 ±<br>0.0013 <sup>A</sup>    |
| 10     | 20.2768 ±<br>0.4507 <sup>EF</sup>  | 8.0799 ±<br>0.1145 <sup>GH</sup> | 7.5449 ±<br>0.1076 <sup>G</sup>  | 7.2580 ±<br>0.1034 <sup>G</sup>  | 0.2869 ±<br>0.0043 <sup>H</sup>  | 0.4701 ±<br>0.0078 <sup>B</sup>  | 12.0876 ±<br>0.1684 <sup>EF</sup> | 0.0650 ±<br>0.0009 <sup>DEF</sup>  |
| 11     | 20.8344 ±<br>0.9489 <sup>EF</sup>  | 10.2145 ±<br>0.2280 <sup>L</sup> | 9.2509 ±<br>0.2058 <sup>I</sup>  | 8.9953 ±<br>0.2030 <sup>J</sup>  | 0.2556 ±<br>0.0045 <sup>FG</sup> | 0.9147 ±<br>0.0230 <sup>K</sup>  | 11.7833 ±<br>0.5039 <sup>EF</sup> | 0.0489 ±<br>0.0012 <sup>BCD</sup>  |
| 12     | 17.8909 ±<br>0.4772 <sup>BC</sup>  | 9.1096 ±<br>0.0674 <sup>I</sup>  | 7.7832 ±<br>0.0610 <sup>G</sup>  | 7.6259 ±<br>0.0615 <sup>H</sup>  | 0.1573 ±<br>0.0009 <sup>B</sup>  | 1.2789 ±<br>0.0061 <sup>N</sup>  | 10.3279 ±<br>0.1735 <sup>CD</sup> | 0.0474 ±<br>0.0014 <sup>BC</sup>   |
| 13     | 23.9440 ±<br>0.6200 <sup>G</sup>   | 9.2111 ±<br>0.2330 <sup>IJ</sup> | 8.4524 ±<br>0.2182 <sup>H</sup>  | 8.1986 ±<br>0.2145 <sup>I</sup>  | 0.2538 ±<br>0.0042 <sup>FG</sup> | 0.6628 ±<br>0.0128 <sup>F</sup>  | 15.2755 ±<br>0.4039 <sup>G</sup>  | 0.0959 ±<br>0.0020 <sup>G</sup>    |
| 14     | 16.9044 ±<br>0.5960 <sup>B</sup>   | 6.7977 ±<br>0.0464 <sup>D</sup>  | 5.9032 ±<br>0.0410 <sup>BC</sup> | 5.7195 ±<br>0.0383 <sup>B</sup>  | 0.1837 ±<br>0.0050 <sup>C</sup>  | 0.8509 ±<br>0.0062 <sup>J</sup>  | 9.3154 ±<br>0.0990 <sup>C</sup>   | 0.0436 ±<br>0.0008 <sup>AB</sup>   |
| 15     | 18.2504 ±<br>0.5975 <sup>BCD</sup> | 7.3153 ±<br>0.0372 <sup>EF</sup> | 6.4904 ±<br>0.0327 <sup>D</sup>  | 6.3353 ±<br>0.0316 <sup>CD</sup> | 0.1551 ±<br>0.0017 <sup>B</sup>  | 0.7840 ±<br>0.0050 <sup>H</sup>  | 12.2140 ±<br>0.3628 <sup>EF</sup> | 0.0409 ±<br>0.0009 <sup>AB</sup>   |
| 16     | 12.0973 ±<br>0.2639 <sup>A</sup>   | 5.2319 ±<br>0.0153 <sup>A</sup>  | 4.6335 ±<br>0.0158 <sup>A</sup>  | 4.5129 ±<br>0.0101 <sup>A</sup>  | 0.1206 ±<br>0.0066 <sup>A</sup>  | 0.5506 ±<br>0.0010 <sup>D</sup>  | 6.9237 ±<br>0.1045 <sup>B</sup>   | 0.0478 ±<br>0.0012 <sup>BC</sup>   |
| 17     | 24.9024 ±<br>0.5718 <sup>G</sup>   | 10.3514 ±<br>0.0744 <sup>L</sup> | 9.1031 ±<br>0.0661 <sup>I</sup>  | 8.8198 ±<br>0.0641 <sup>J</sup>  | 0.2833 ±<br>0.0021 <sup>H</sup>  | 1.1760 ±<br>0.0056 <sup>M</sup>  | 15.4490 ±<br>0.5509 <sup>G</sup>  | 0.0723 ±<br>0.0027 <sup>F</sup>    |

|    |                                  |                                  |                                 |                                 |                                 |                                  |                                  |                                  |
|----|----------------------------------|----------------------------------|---------------------------------|---------------------------------|---------------------------------|----------------------------------|----------------------------------|----------------------------------|
| 18 | 27.0718 ±<br>0.5877 <sup>H</sup> | 9.7607 ±<br>0.0773 <sup>K</sup>  | 9.2005 ±<br>0.0684 <sup>I</sup> | 8.9736 ±<br>0.0581 <sup>J</sup> | 0.2269 ±<br>0.0107 <sup>E</sup> | 0.5141 ±<br>0.0100 <sup>C</sup>  | 18.0127 ±<br>0.4146 <sup>I</sup> | 0.0461 ±<br>0.0004 <sup>BC</sup> |
| 19 | 12.3571 ±<br>0.3421 <sup>A</sup> | 7.0648 ±<br>0.0330 <sup>DE</sup> | 5.9573 ±<br>0.0295 <sup>C</sup> | 5.6958 ±<br>0.0351 <sup>B</sup> | 0.2615 ±<br>0.0082 <sup>G</sup> | 1.0626 ±<br>0.0060 <sup>L</sup>  | 5.1216 ±<br>0.2020 <sup>A</sup>  | 0.0449 ±<br>0.0011 <sup>BC</sup> |
| 20 | 29.7552 ±<br>0.5935 <sup>I</sup> | 9.4390 ±<br>0.0157 <sup>J</sup>  | 8.4969 ±<br>0.0389 <sup>H</sup> | 8.2018 ±<br>0.0322 <sup>I</sup> | 0.2950 ±<br>0.0073 <sup>H</sup> | 0.8286 ±<br>0.0027 <sup>IJ</sup> | 19.4843 ±<br>0.3652 <sup>J</sup> | 0.1136 ±<br>0.0230 <sup>H</sup>  |

---

Results are presented as means ± SD ( $n = 3$ ). For each parameter, different superscript letters indicate significant differences ( $p < 0.05$ ). TPC, total phenolic content in gallic acid equivalents (GAE) determined by Folin-Ciocalteu assay; TPH, total phenolic content determined by RP-HPLC-PDA; THCA, total content of hydroxycinnamic acid derivatives (TCHA+TCFA); TCHA, total content of mono- and dicaffeoylquinic acids isomers; TCFA, total content of phenolic acids derivatives other than TCHA; TFL, total content of flavonoids; TPA, total proanthocyanidin content in cyanidin chloride equivalents (CyE) determined by *n*-butanol/HCl assay; TLPA, total content of proanthocyanidin determined by RP-HPLC-PDA.
